# Supplementary material
Source: publisher figshare collection journal article supplement (https://sage.figshare.com/ndownloader/files/22849556)
Supplement: Supplementary file 1 [file 22849556]

## Appendix II. The frequencies of the ethical issues

|                                                                                                                                                                                |    |
|--------------------------------------------------------------------------------------------------------------------------------------------------------------------------------|----|
| <b>Respect for Autonomy</b>                                                                                                                                                    |    |
| <b>Frequency</b>                                                                                                                                                               |    |
| Respect for older peoples' autonomy (restriction of autonomy, self - determination, and self-esteem)                                                                           | 41 |
| Elderly needs, wishes, values                                                                                                                                                  | 37 |
| Elderly decision-making                                                                                                                                                        | 36 |
| Human dignity (respect/lack)                                                                                                                                                   | 20 |
| Elderly competence in decision-making                                                                                                                                          | 20 |
| Information given/received                                                                                                                                                     | 19 |
| Family member/staff decision making                                                                                                                                            | 17 |
| Elderly independence                                                                                                                                                           | 17 |
| Informed consent (verbal/written communication)                                                                                                                                | 16 |
| Patient difficulties in communication (related to decisions)                                                                                                                   | 8  |
| Family members as advocates                                                                                                                                                    | 7  |
| Health care practitioners as the patient's advocate                                                                                                                            | 6  |
| Family member wishes                                                                                                                                                           | 5  |
| <b>Non-maleficence</b>                                                                                                                                                         |    |
| Treatment issues (medication, life-prolonging, sustaining, artificial treatment and feeding) /choice of no treatment, refuse treatment/nutrition, force using during treatment | 19 |
| Do not harm (while treating/feeding the patients)                                                                                                                              | 10 |
| Advance directive (at the end of life decision-making), living wills, durable power of attorney, advance care planning                                                         | 10 |
| Withholding/withdrawing treatment/food/hydration                                                                                                                               | 7  |
| Negligence (on caring for long-term care patients)                                                                                                                             | 6  |
| Pain management (use of sedatives, analgesics)                                                                                                                                 | 5  |
| Active euthanasia/assisted suicide/passive euthanasia                                                                                                                          | 3  |
| Genetics (technology-genetic testing)                                                                                                                                          | 2  |
| <b>Beneficence</b>                                                                                                                                                             |    |
| Beneficence, benevolence, well-being, relieve suffering, sanctity of life                                                                                                      | 18 |
| Benefits, costs (financial costs, risk, burdens, harm at the end of life)                                                                                                      | 13 |
| Preventing from harm (from falling, starve to death)                                                                                                                           | 12 |
| Patient's best interest                                                                                                                                                        | 11 |
| Utility (on medication, minimizing pain, benefits over harm)                                                                                                                   | 7  |
| Paternalism on decision-making                                                                                                                                                 | 5  |
| <b>Justice</b>                                                                                                                                                                 |    |
| Elderly abuse (physical, psychological, emotional, social integrity)                                                                                                           | 9  |
| The principle of justice (distributive and social)                                                                                                                             | 7  |
| Staff abuse (aggressive behavior from residents)                                                                                                                               | 6  |
| Equality                                                                                                                                                                       | 2  |
| Fairness                                                                                                                                                                       | 1  |
| Discrimination (age discrimination)                                                                                                                                            | 1  |

## Appendix II. The frequencies of the ethical issues (continued)

|                                                                                                                                                                        |    |
|------------------------------------------------------------------------------------------------------------------------------------------------------------------------|----|
| <b>Other ethical issues</b>                                                                                                                                            |    |
| <b>Frequency</b>                                                                                                                                                       |    |
| Patient's rights                                                                                                                                                       | 17 |
| Fidelity (trusting nurse-patient relationship)                                                                                                                         | 11 |
| Emotional issues (forgetfulness, desire to be noticed, difficulties to express themselves, spiritual needs)                                                            | 8  |
| Privacy (respect/violation)                                                                                                                                            | 7  |
| Veracity (truth-telling from the staff to the patients)                                                                                                                | 6  |
| Patient-family relationship                                                                                                                                            | 5  |
| Confidentiality (related to privacy)                                                                                                                                   | 3  |
| Preservation of life                                                                                                                                                   | 2  |
| <b>Professional issues</b>                                                                                                                                             |    |
| Health care services and systems (shortfall of financial resources, organization)                                                                                      | 18 |
| Staff experience/competence/capacity (training, skills, knowledge related to care, treatment and patients' rights)                                                     | 17 |
| Communication within the team, with patients and family members                                                                                                        | 14 |
| Duty to provide care (and safety to the patient)                                                                                                                       | 11 |
| Limited staff and time (short on staff and time, to provide qualitative care)                                                                                          | 10 |
| Cultural (and emotional) influences (in respecting old people, not letting them die, the trust of the patient, related care, emotions when treating terminal patients) | 9  |
| Professional care ethics/ethical standards and codes                                                                                                                   | 6  |
| Professional judgment (force feeding/treating)                                                                                                                         | 4  |
| Staff conflicts over management of patient care/treatment                                                                                                              | 2  |
| <b>Ethical dilemma</b>                                                                                                                                                 |    |
| Benefits versus harm                                                                                                                                                   | 4  |
| Beneficence versus autonomy                                                                                                                                            | 3  |
| Ethical dilemma in different care situations, nutritional support, and treatment                                                                                       | 3  |
| Paternalism versus autonomy                                                                                                                                            | 2  |
| Autonomy versus self-endangering behavior                                                                                                                              | 1  |
| Futility versus harm                                                                                                                                                   | 1  |
| Duty to respect the patient's rights versus duty to protect those from harm                                                                                            | 1  |
| Values of continued life versus the value of good QoL, versus the value of autonomy                                                                                    | 1  |
| Longevity versus QoL (quality of life)                                                                                                                                 | 1  |
| Costs of treatment versus benefits                                                                                                                                     | 1  |
